# Supplementary material for: Tunable NiOₓ-MoO₃-MoS₂ nanocomposites: synthesis, structural insights, and enhanced photocatalytic performance
Source: Research Square preprint supplement (doi:10.21203/rs.3.rs-7802560/v1), 2025-10-30
Supplement: Supplementary file 1 [file 42c9f7681b768db7bb9e17b5.docx]

**Tunable NiOₓ-MoO₃-MoS₂ nanocomposites: synthesis, structural insights, and enhanced photocatalytic performance**


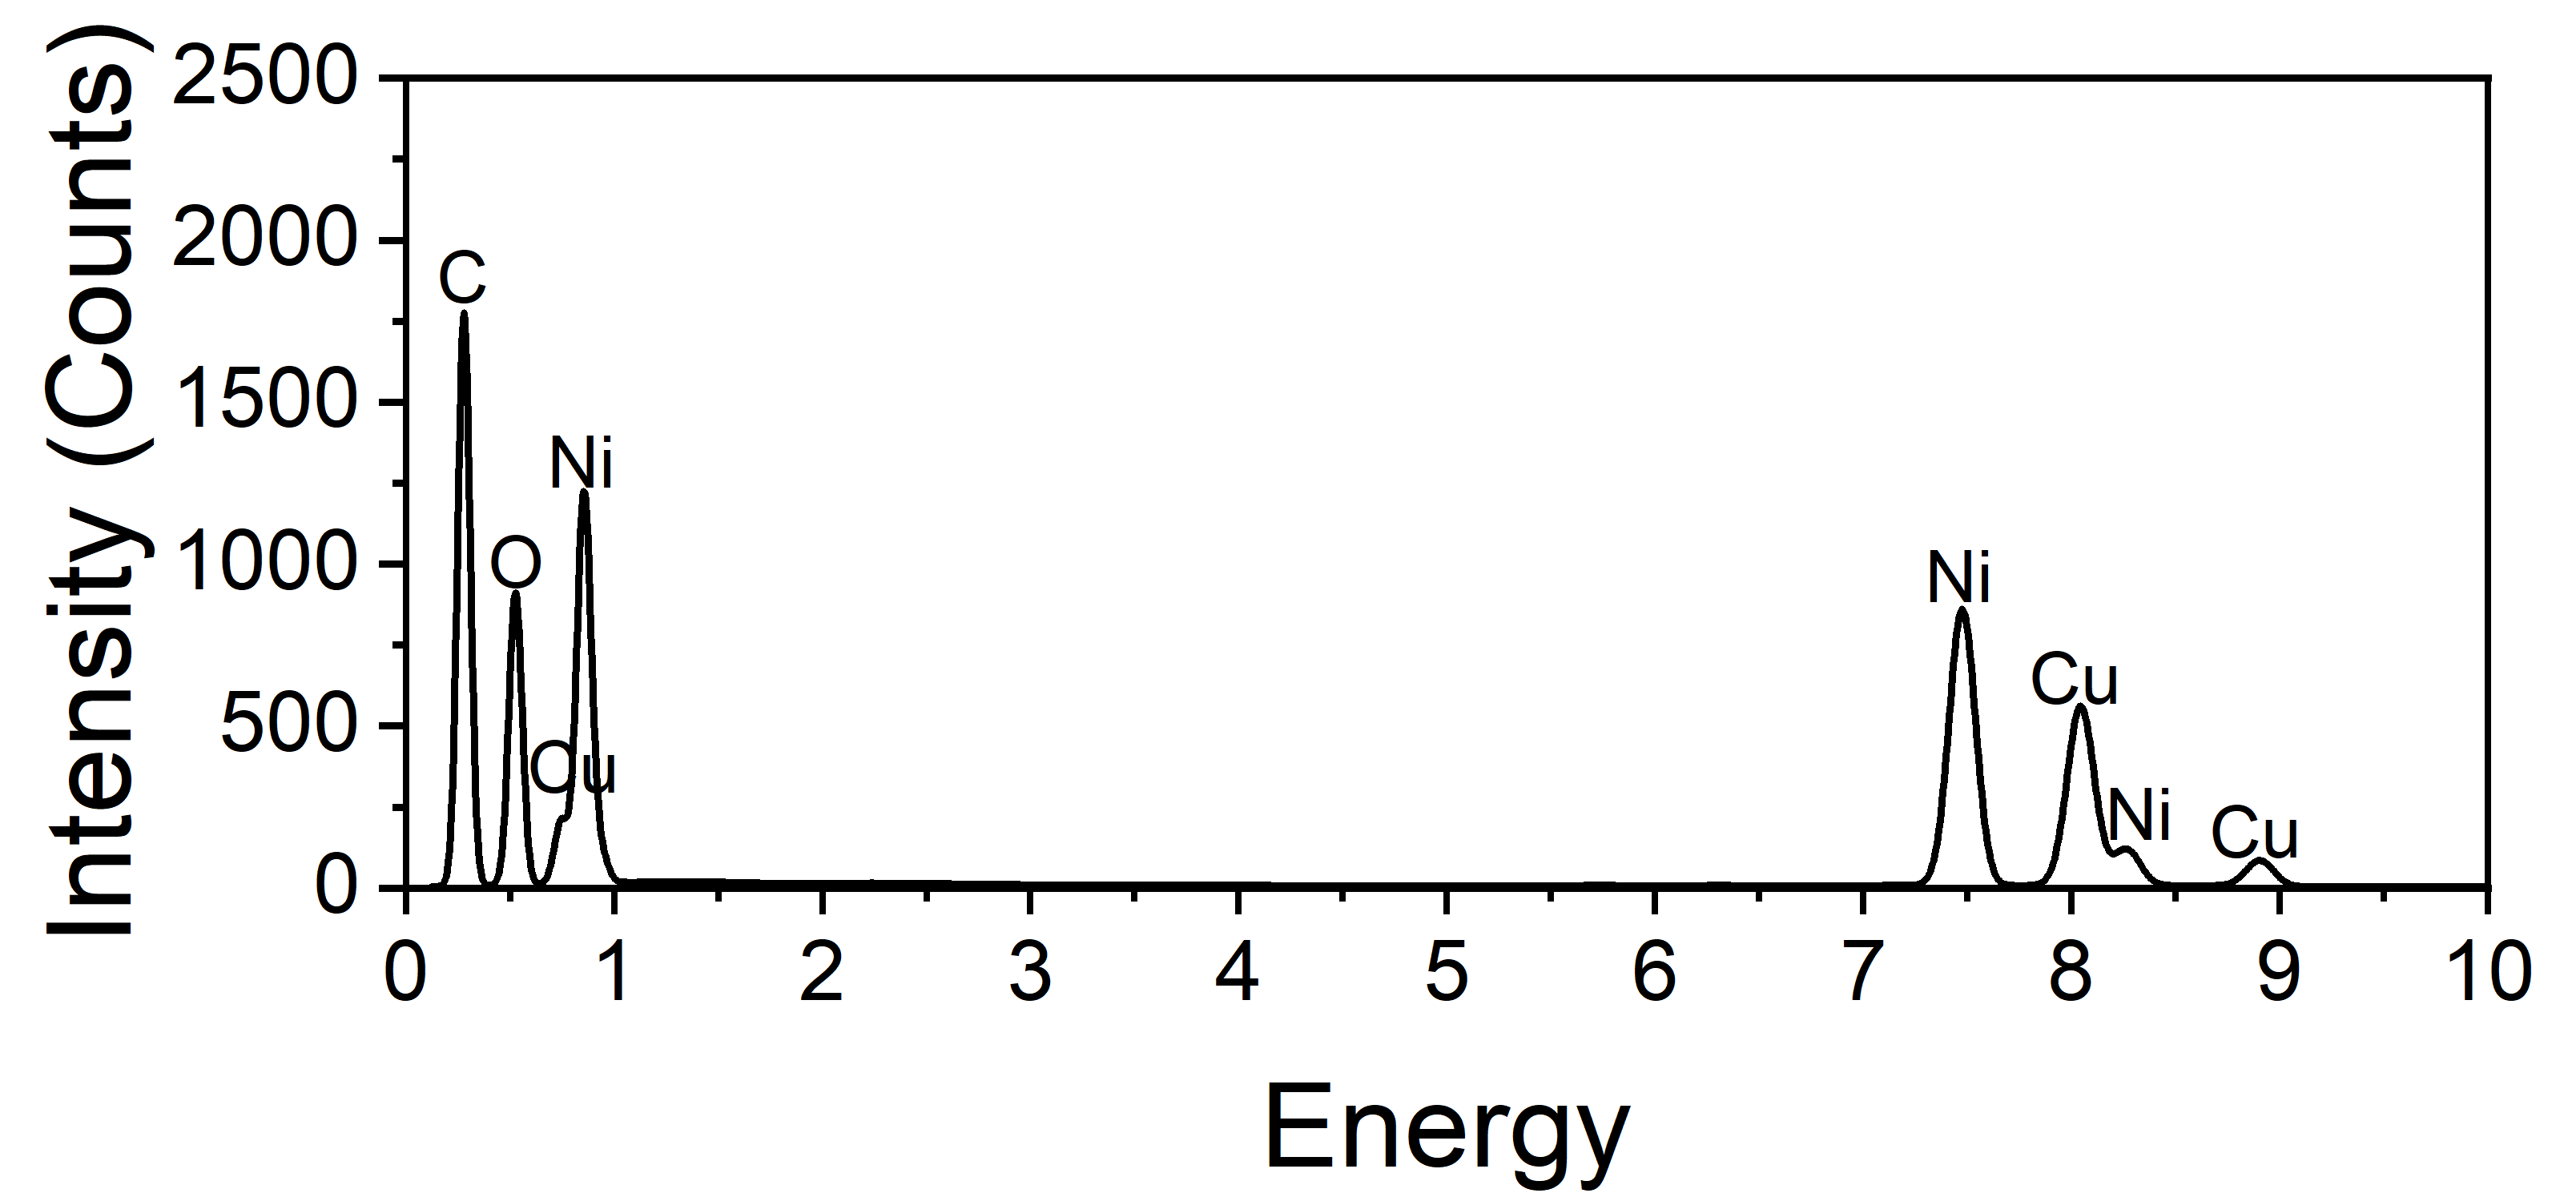


**Figure S1**: Energy‐dispersive X‐ray spectroscopy (EDS) spectrum of NiOₓ NPs.


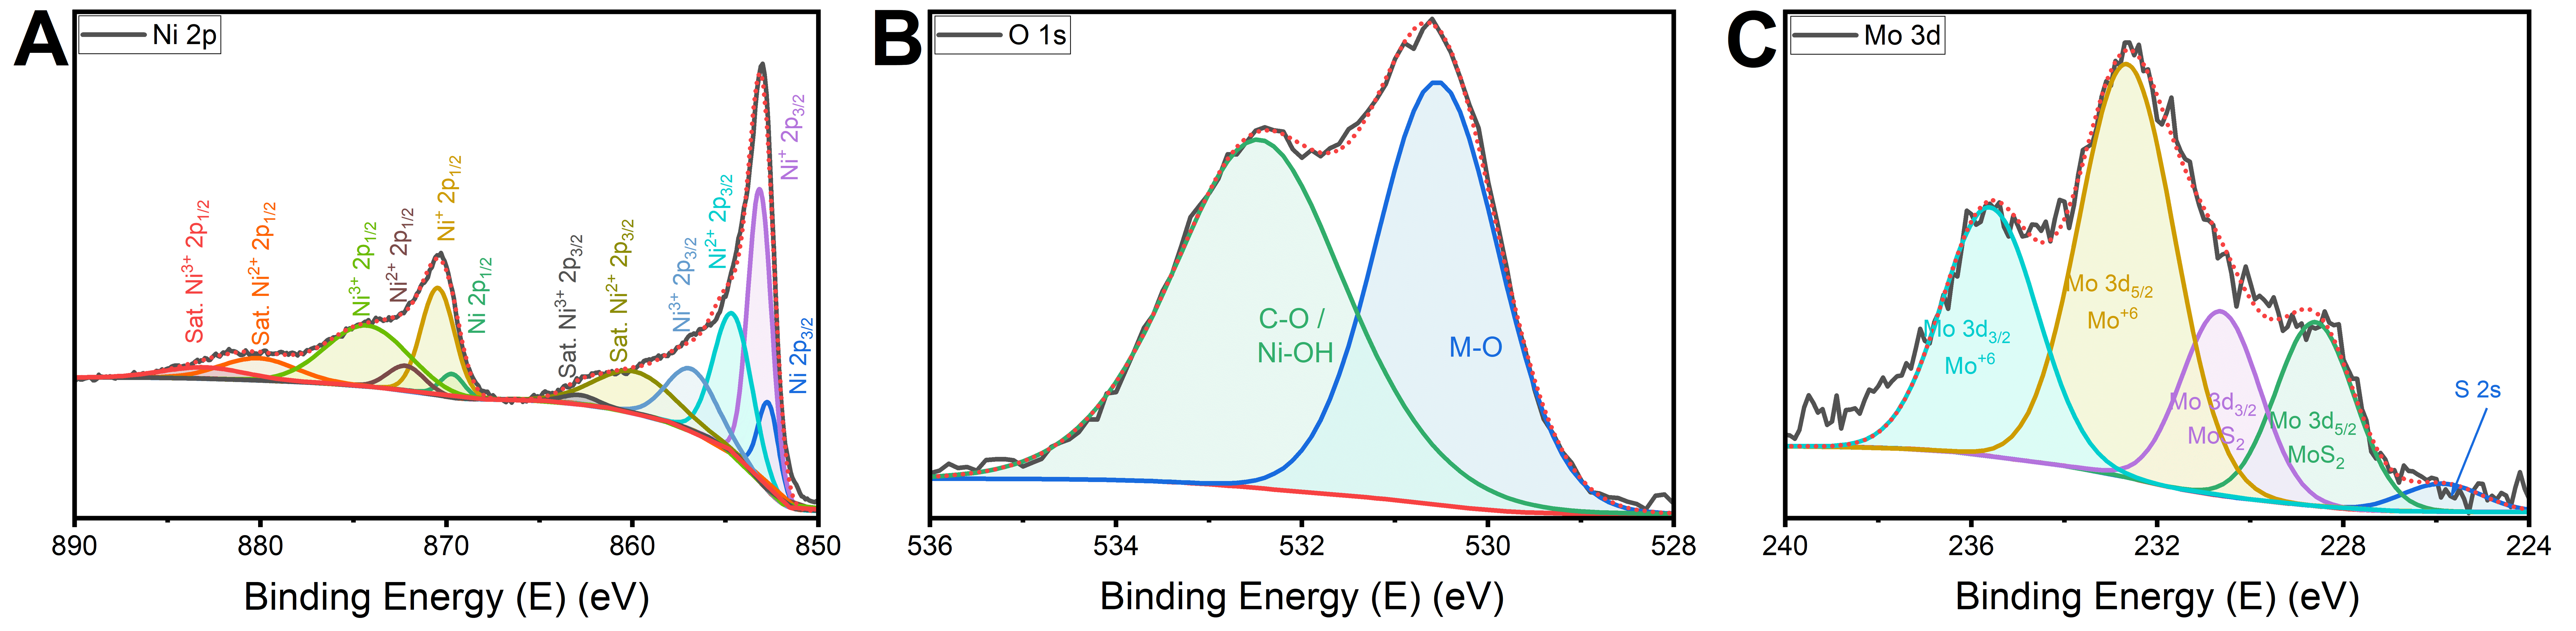

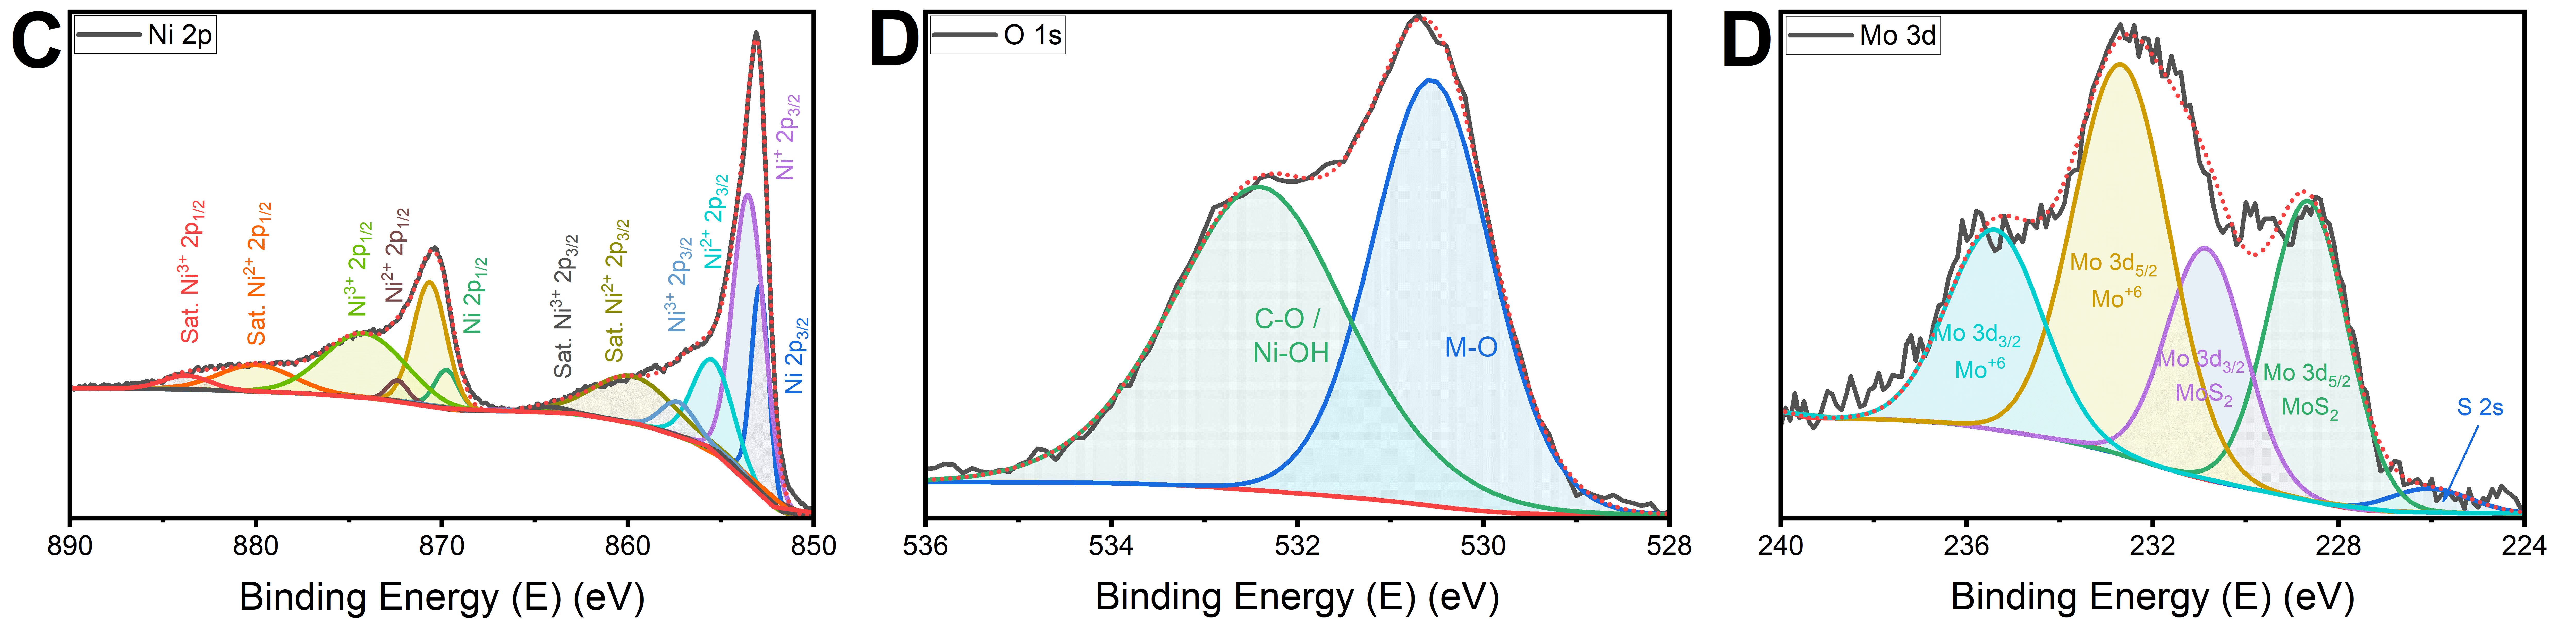

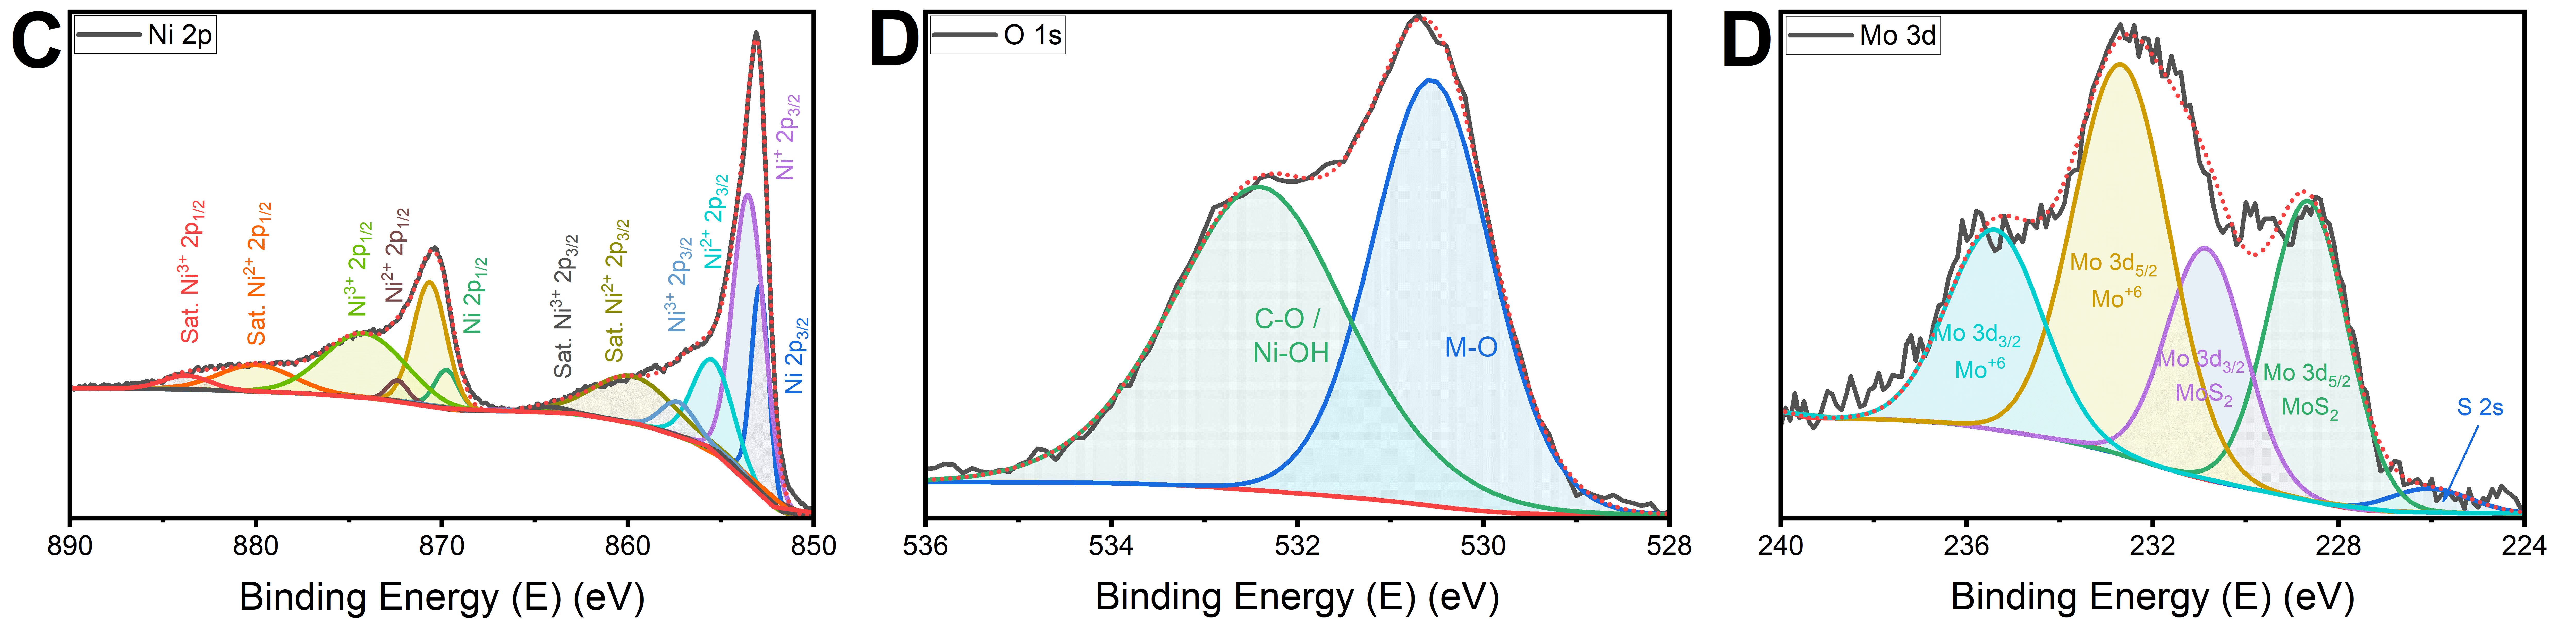

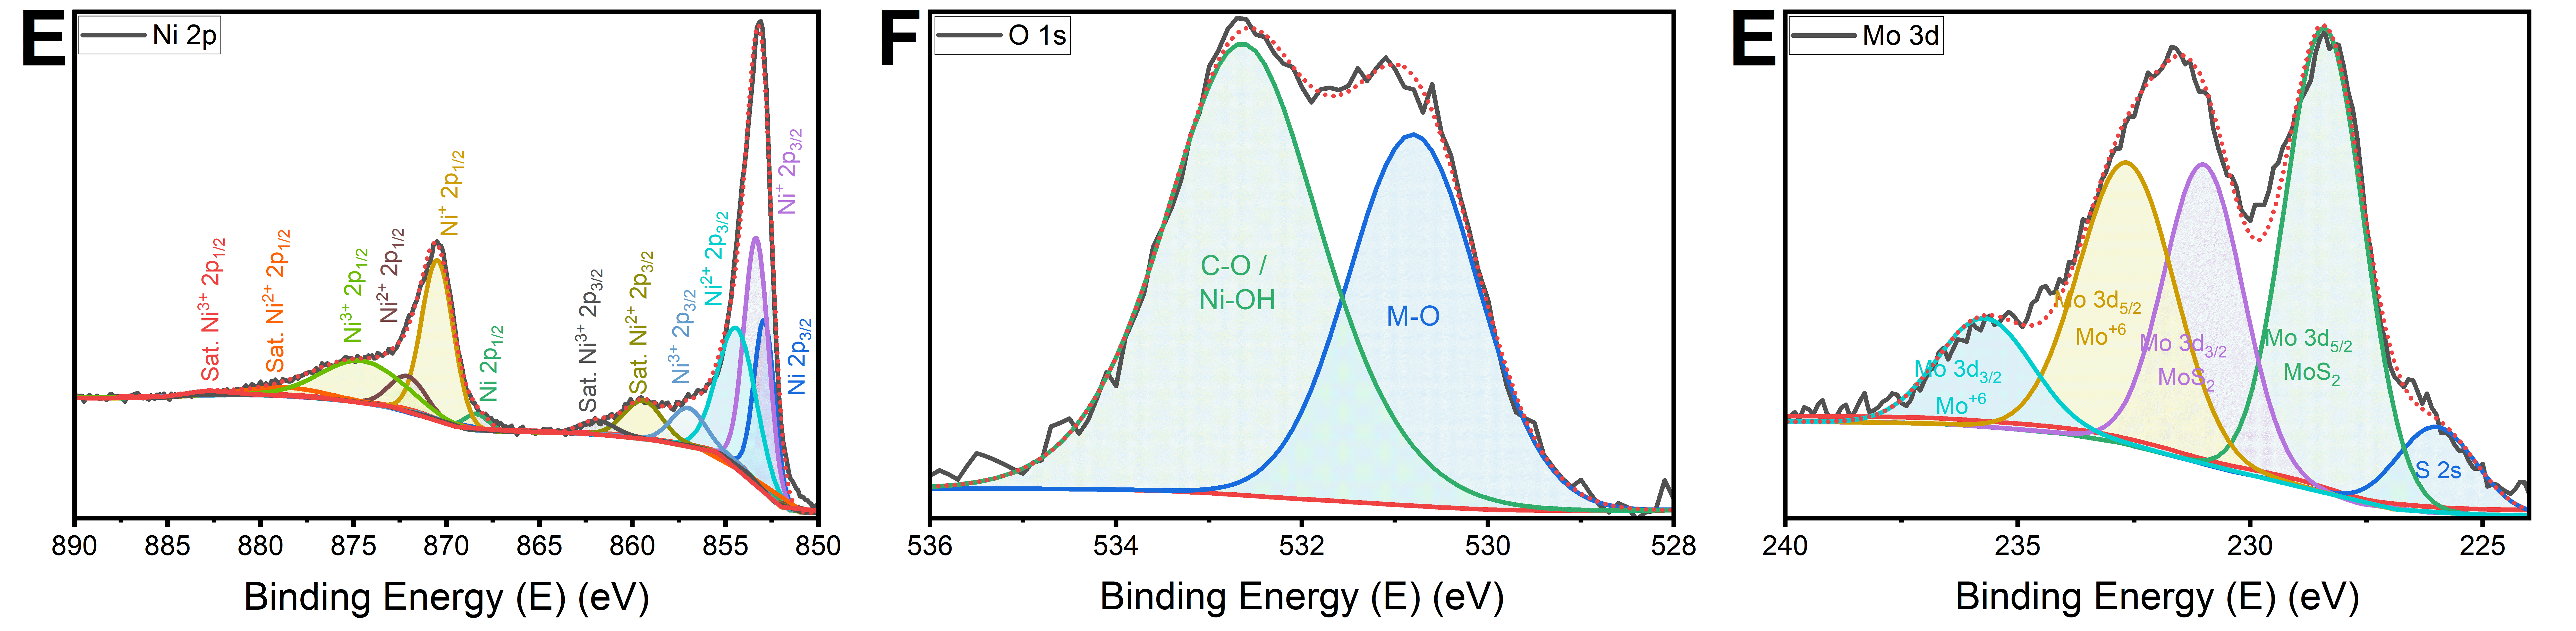


**Figure S2**: XPS spectra of Ni 2p and O 1s for (A,B) NMOS-I, (C,D) NMOS-II and (E,F) NMOS-III NCs.

**Table S1:** XPS binding energies and atomic concentrations of NiOₓ and NMOS-I-III NCs.


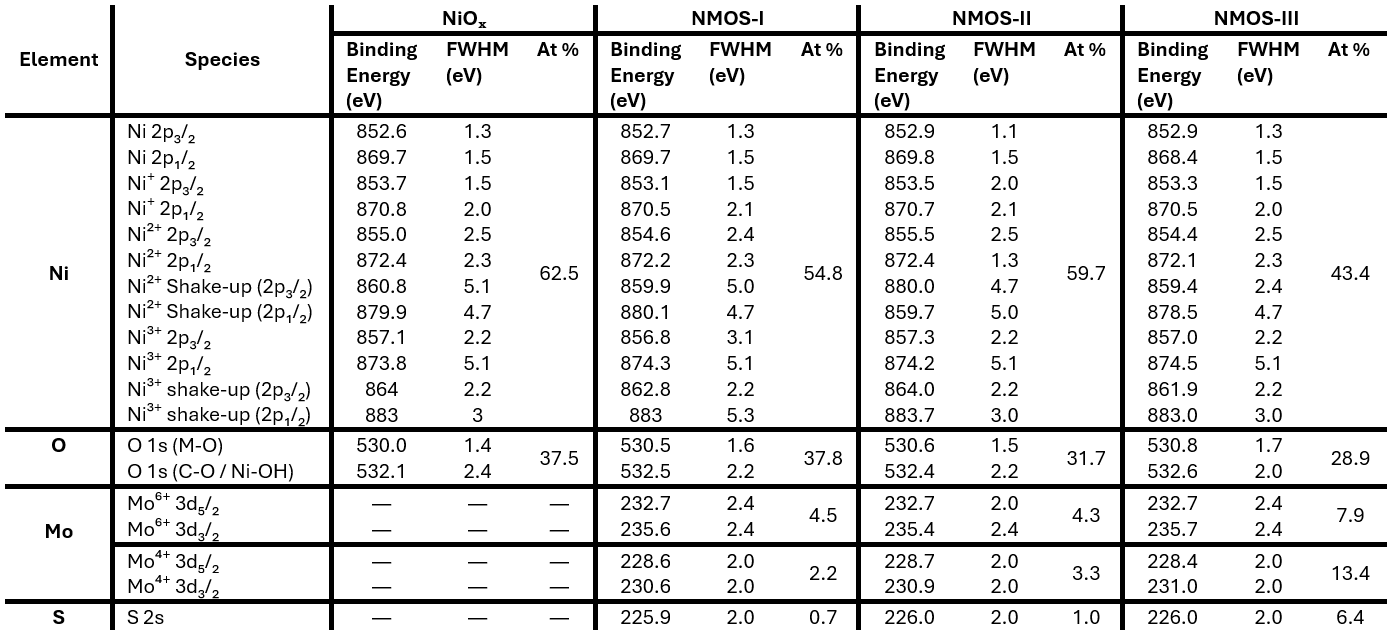


**Table S2:** Raman peaks of NiOₓ and NMOS-I-III NCs.

| Sample | Raman Peaks (cm⁻¹) | Phase Assignment |
| --- | --- | --- |
| NiOₓ | 398 (TO), 514 (LO, defect), 725 (2TO), 1077 (2LO) | NiO |
| NMOS-I | 538 (LO), 1093 (2LO) | NiO (weakened) |
| 356 (Mo–O bend), 765 (O–Mo–O bridge),  819, 851 (Mo–O–Mo sym.), 891 (Mo=O term.),  940 (polyoxo Mo–O) | MoO₃ |
| NMOS-II | 545 (LO, weak) | NiO (suppressed) |
| 364 (Mo–O bend), 756–763 (Mo–O–Mo str.),  816 (Mo=O), 858, 888 (Mo–O str./bend),  940 (polyoxo Mo–O) | MoO₃ |
| NMOS-III | 707, 824, 863, 905, 953, 1007 | MoO₃ |
| 376 (E¹₂g), 403 (A₁g), 460 (A₁u) | MoS₂ |
| 344 | NiS |


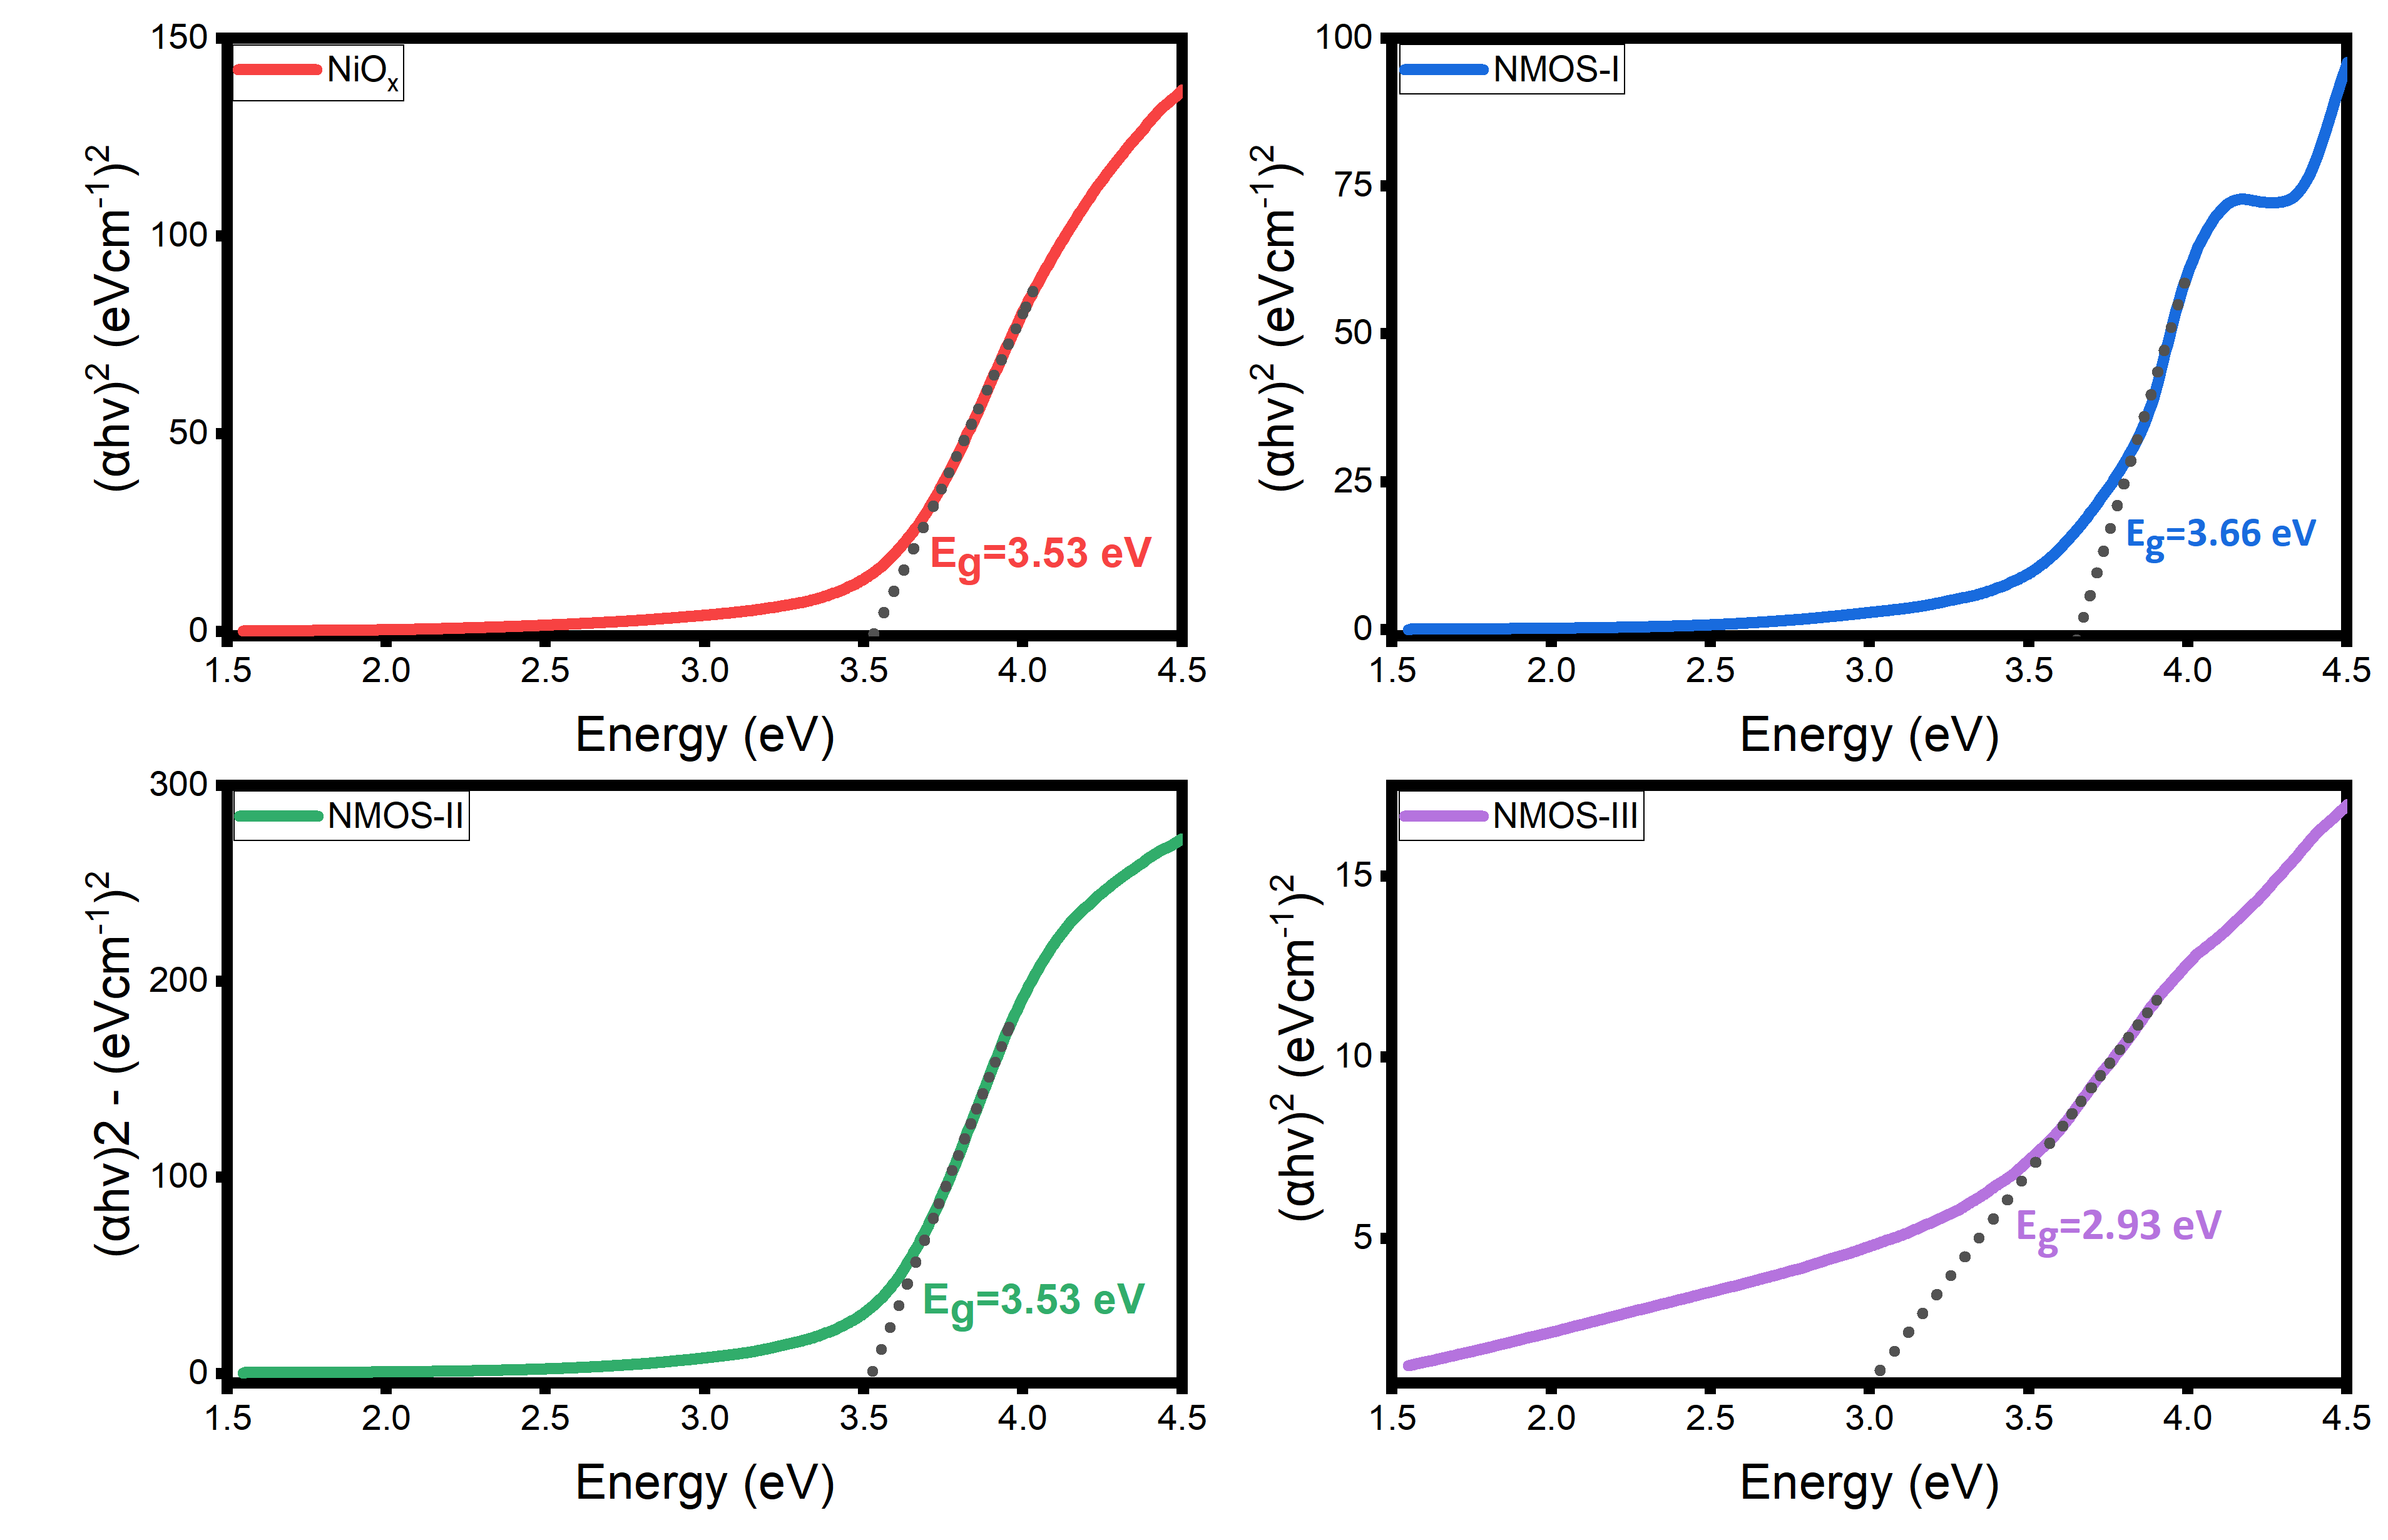


**Figure S3**: Tauc plots used to calculate the optical band gap from the absorption spectra for NiOₓ NPs (blue), NMOS-I (red), NMOS-II (green), and NMOS-III (purple).


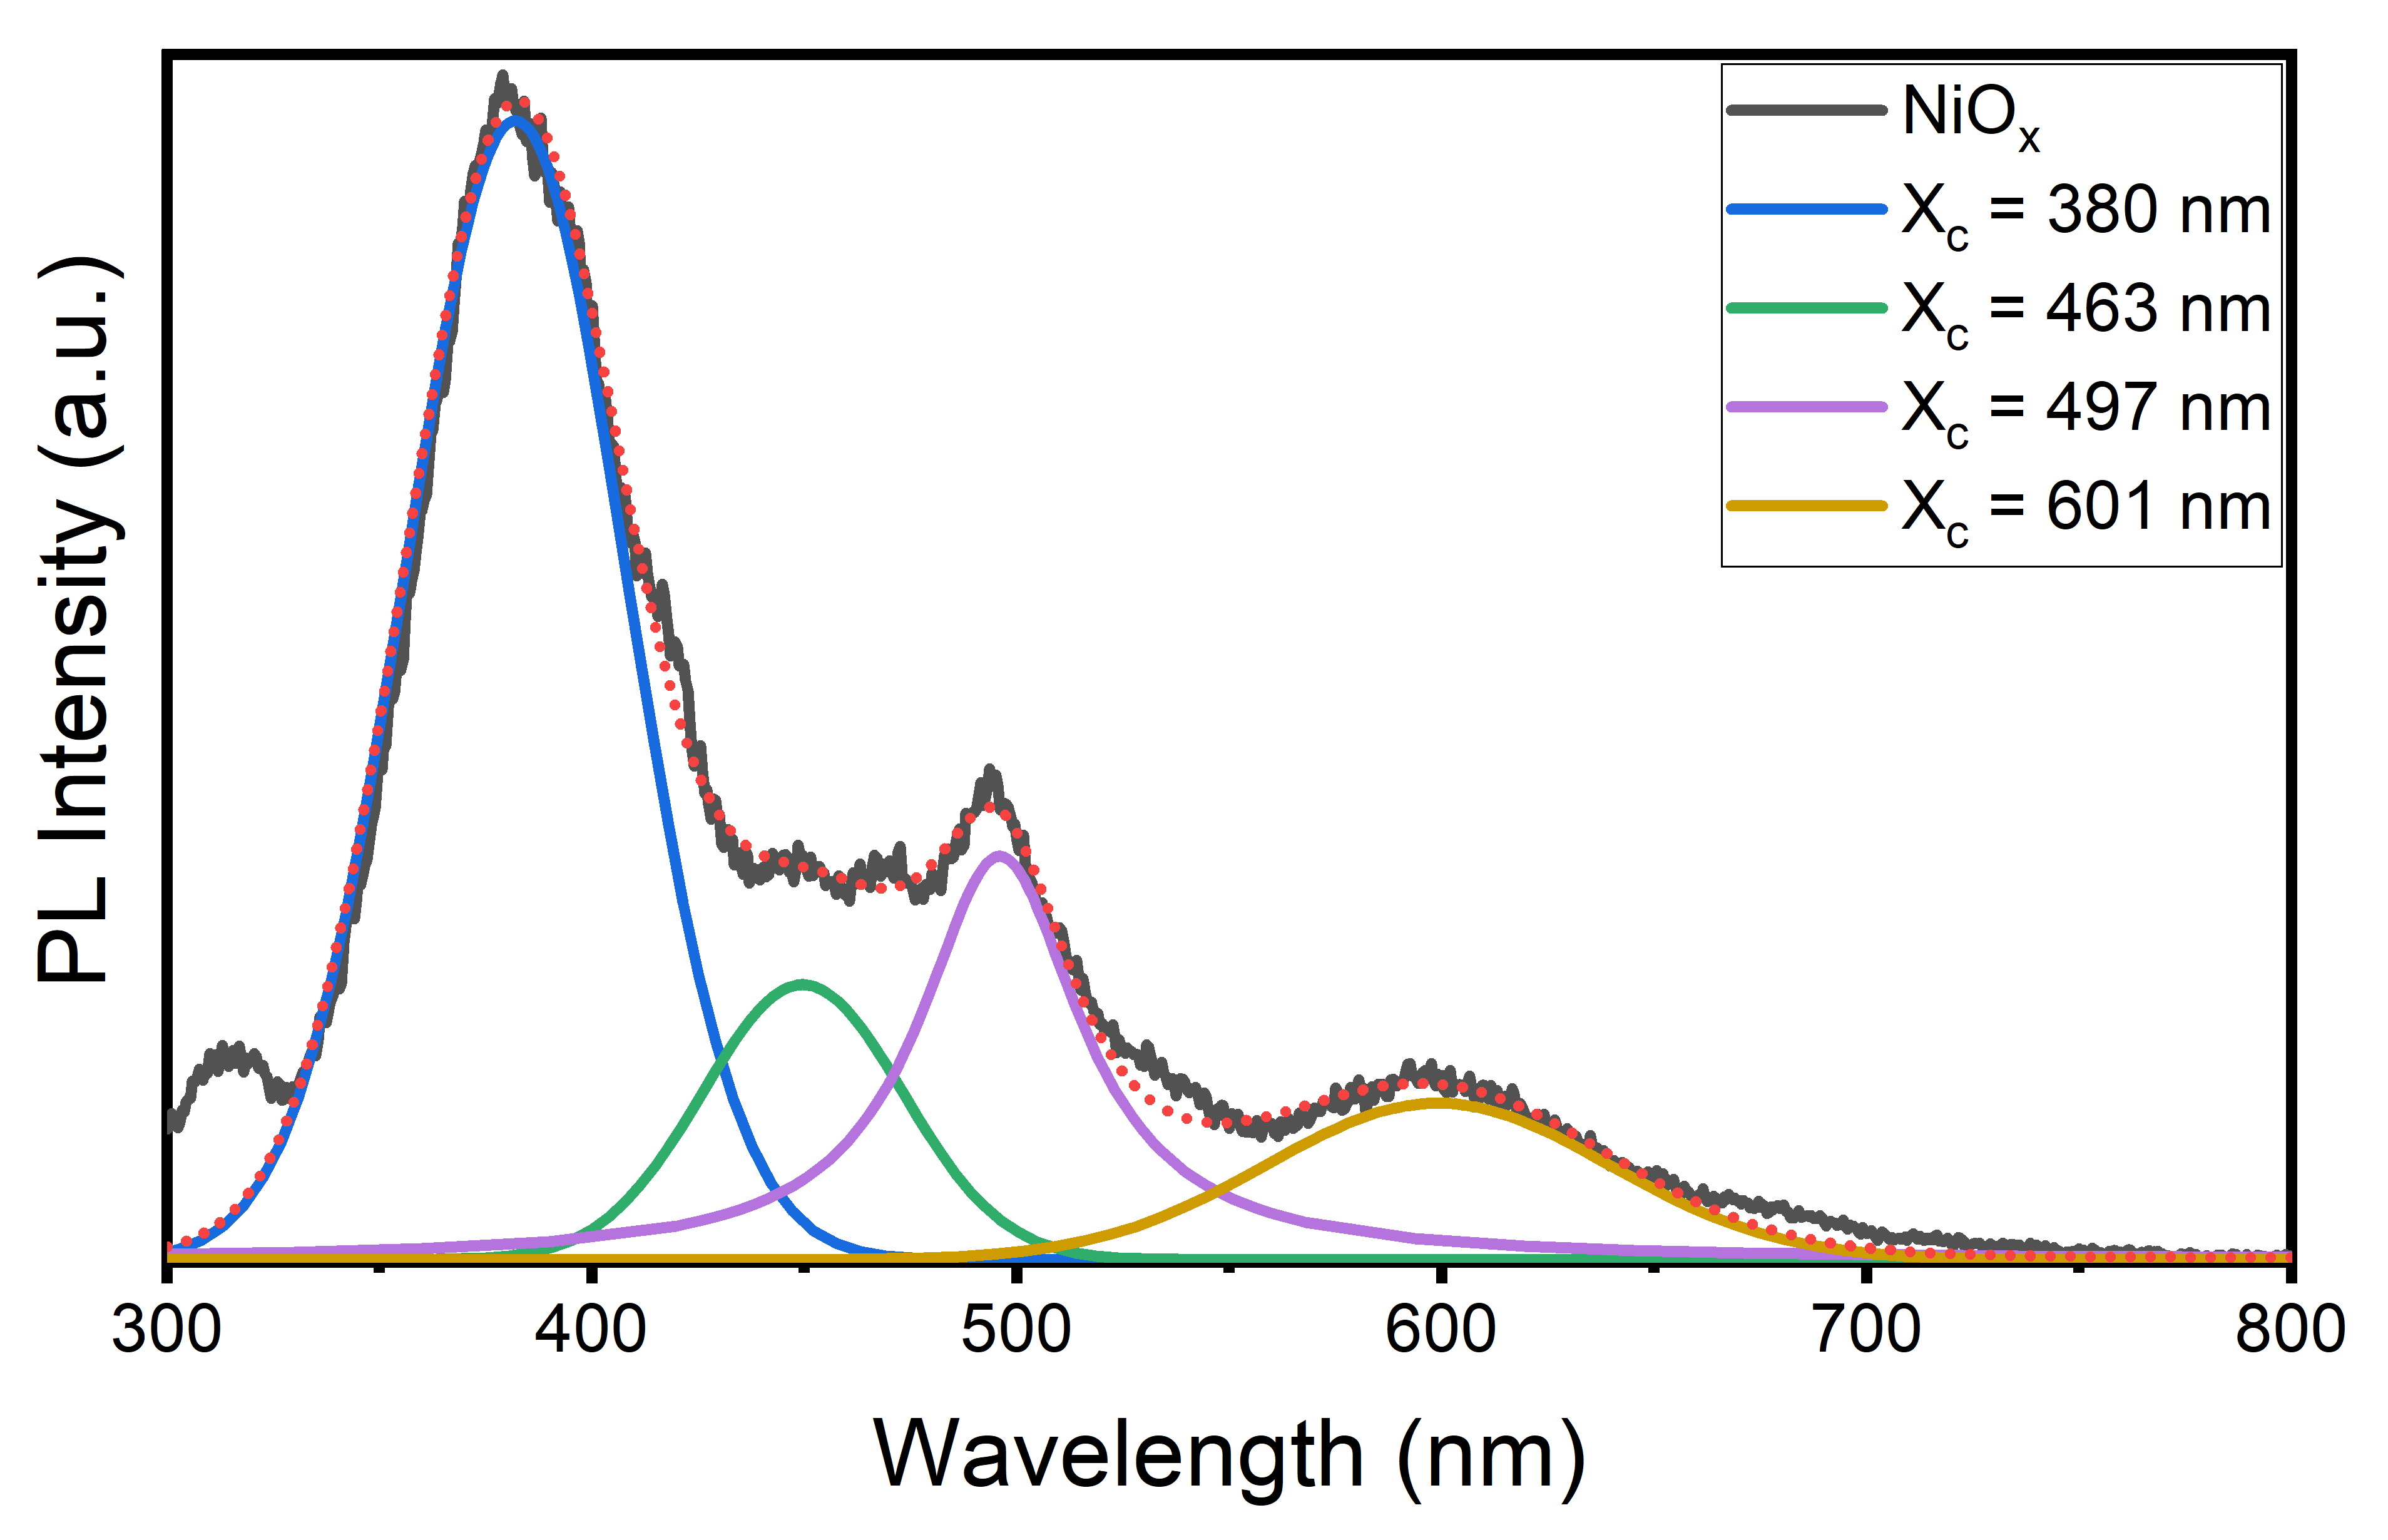


**Figure S4**: Deconvoluted PL spectra of NiOₓ at an excitation wavelength of 250 nm.

**Table S3**: Deconvolution parameters of PL spectra for NiOₓ and NMOS-I-III at an excitation wavelength of 250 nm.

| **Peak Index** | **NiOₓ** | | | **NMOS-I** | | | **NMOS-II** | | | **NMOS-III** | | |
| --- | --- | --- | --- | --- | --- | --- | --- | --- | --- | --- | --- | --- |
| **Center Peak (nm)** | **FWHM**  **(nm)** | **Area (%)** | **Center Peak (nm)** | **FWHM**  **(nm)** | **Area (%)** | **Center Peak (nm)** | **FWHM**  **(nm)** | **Area (%)** | **Center Peak (nm)** | **FWHM**  **(nm)** | **Area (%)** |
| **1** | 380 | 55 | 48 | 381 | 65 | 61 | 382 | 64 | 58 | 381 | 50 | 49 |
| **2** | 463 | 120 | 38 | 453 | 52 | 11 | 448 | 52 | 10 | 444 | 55 | 16 |
| **3** | 497 | 20 | 3 | 495 | 42 | 20 | 494 | 48 | 23 | 495 | 46 | 23 |
| **4** | 601 | 80 | 11 | 599 | 85 | 8 | 601 | 85 | 8 | 600 | 90 | 13 |

**Table S4**: Deconvolution parameters of PL spectra for NiOₓ and NMOS-I-III at an excitation wavelength of 532 nm.

| **Peak Index** | **NiOₓ** | | | **NMOS-I** | | | **NMOS-II** | | | **NMOS-III** | | |
| --- | --- | --- | --- | --- | --- | --- | --- | --- | --- | --- | --- | --- |
| **Center Peak (nm)** | **FWHM**  **(nm)** | **Area (%)** | **Center Peak (nm)** | **FWHM**  **(nm)** | **Area (%)** | **Center Peak (nm)** | **FWHM**  **(nm)** | **Area (%)** | **Center Peak (nm)** | **FWHM**  **(nm)** | **Area (%)** |
| **1** | 632 | 18 | 4 | 633 | 18 | 9 | 629 | 20 | 5 | 633 | 17 | 12 |
| **2** | 665 | 48 | 7 | 661 | 70 | 17 | 670 | 50 | 58 | 668 | 61 | 12 |
| **3** | 563 | 54 | 89 | 480 | 125 | 74 | 723 | 47 | 7 | 400 | 177 | 76 |
| **4** |  |  |  |  |  |  | 488 | 124 | 30 |  |  |  |


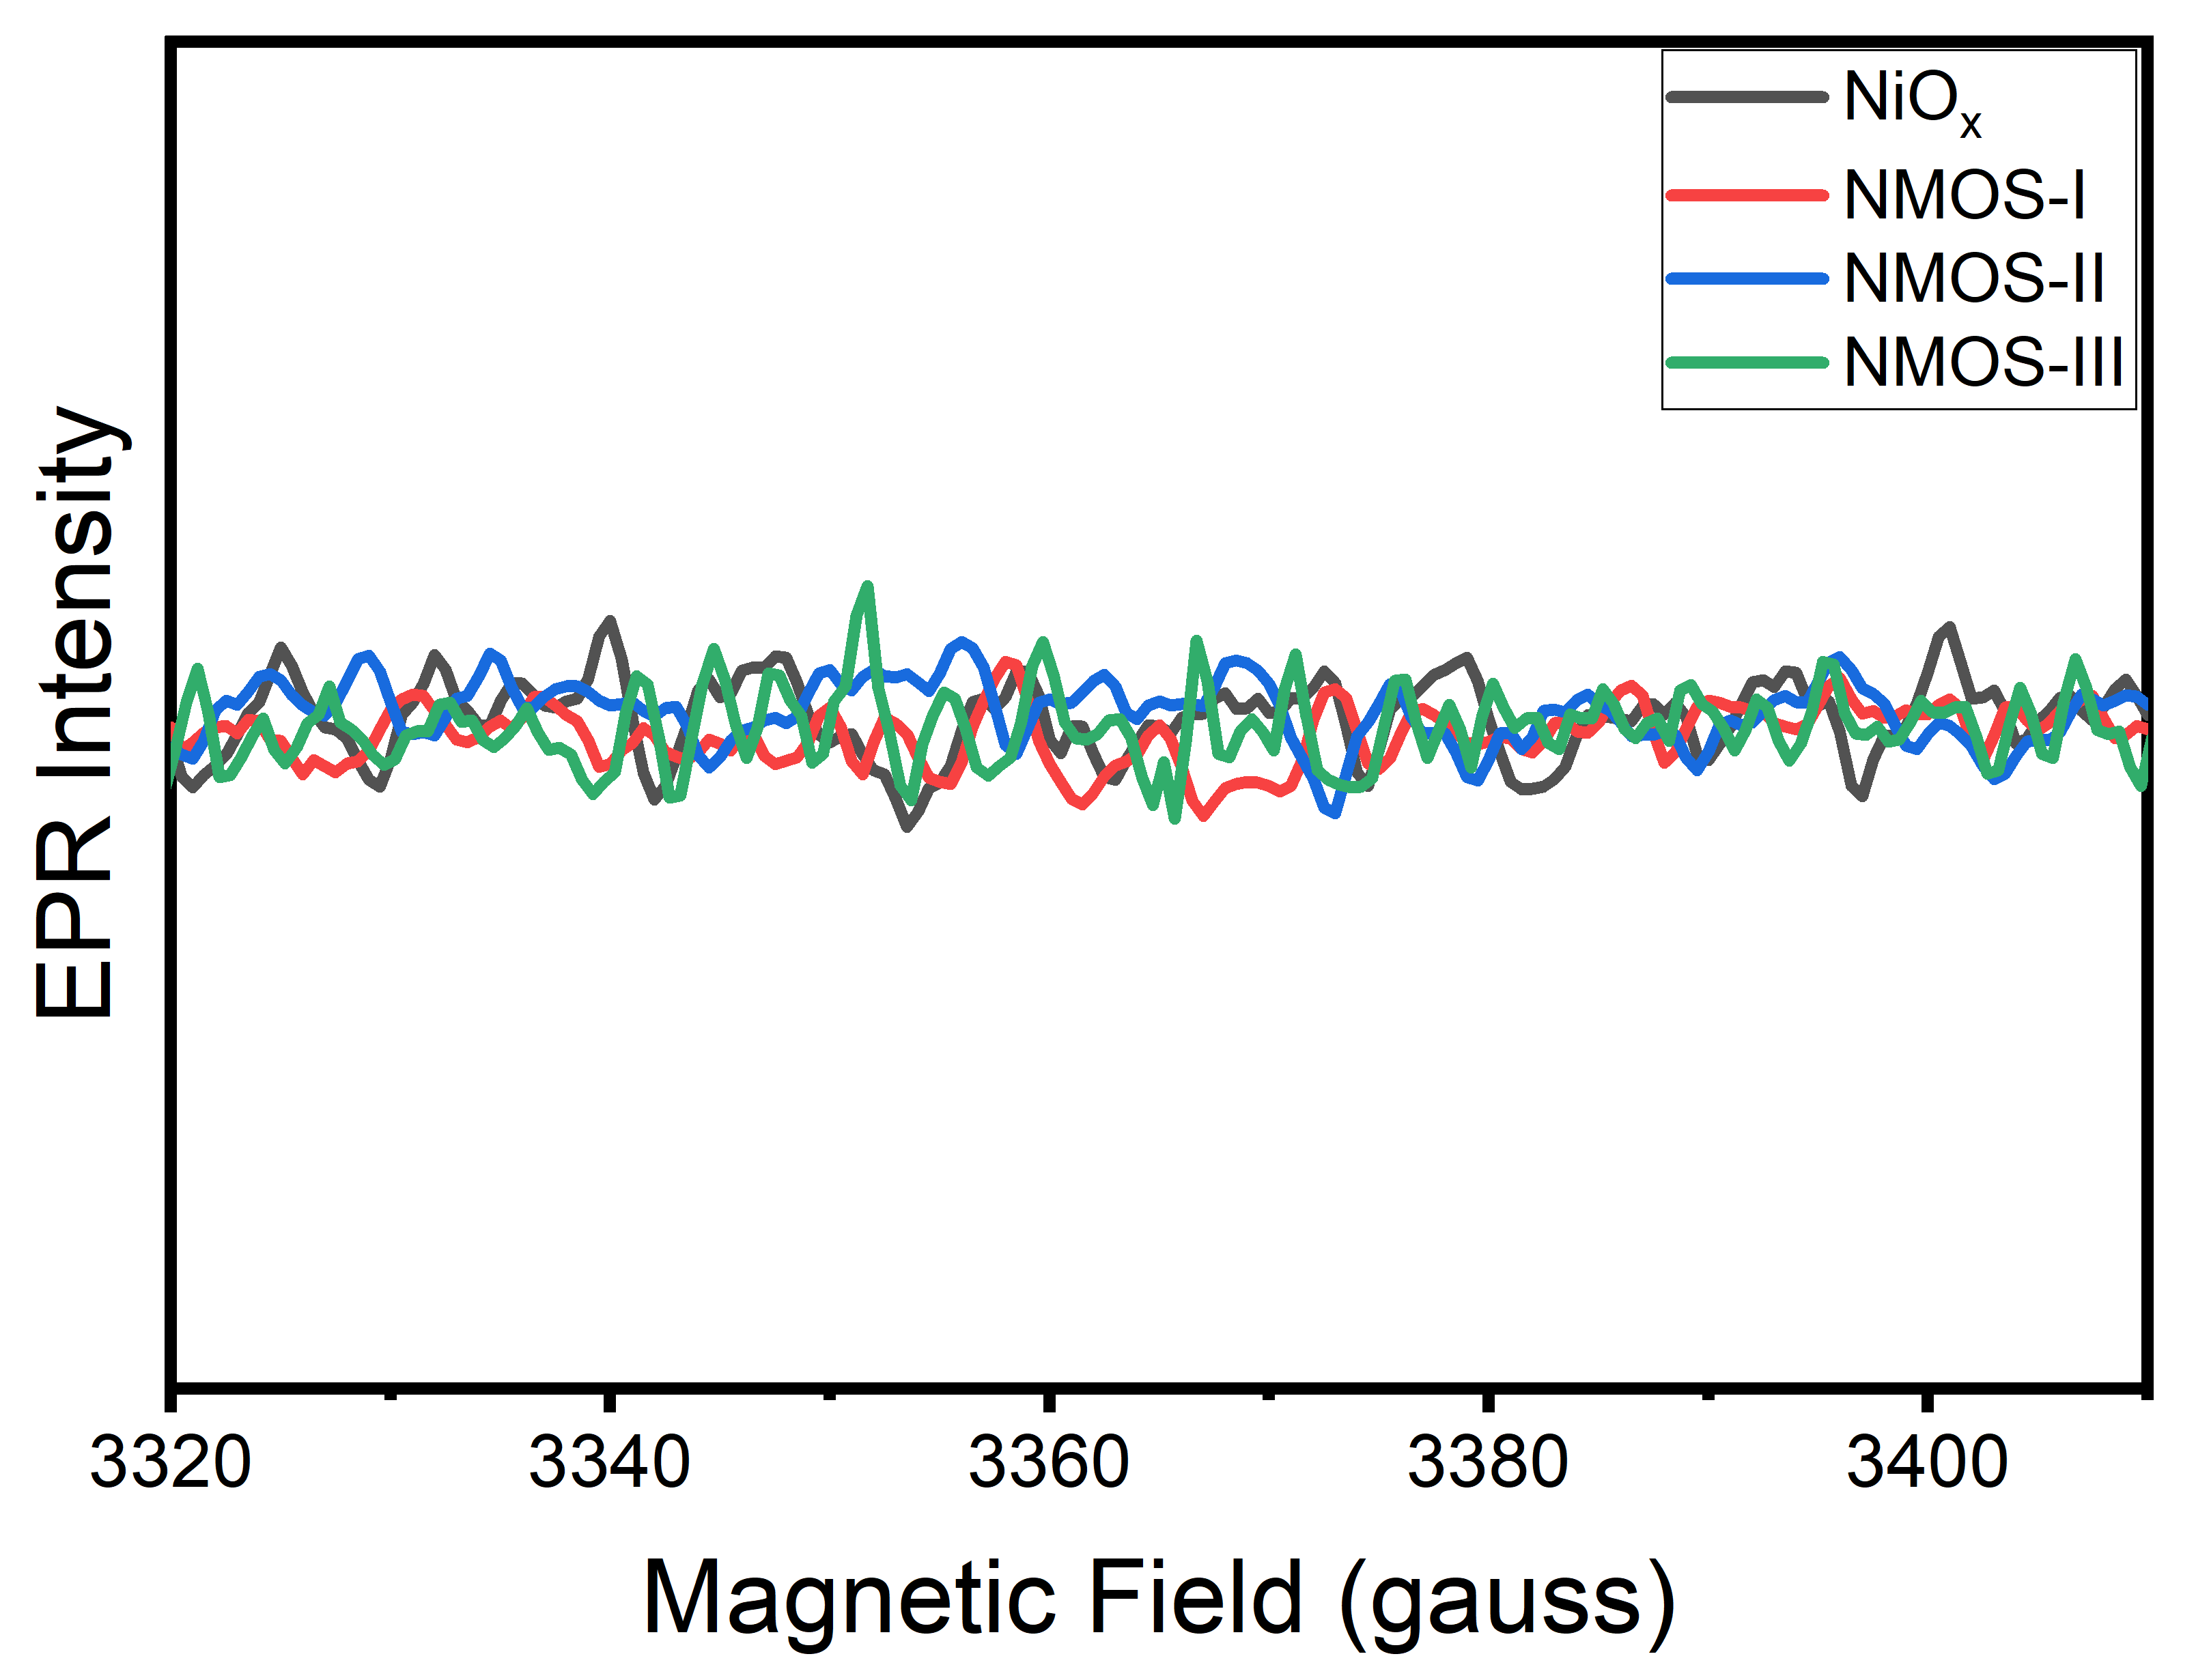


**Figure S4**: EPR spectra acquired under dark of NiOₓ and NMOS-I-III with BMPO as a “spin-trap”.


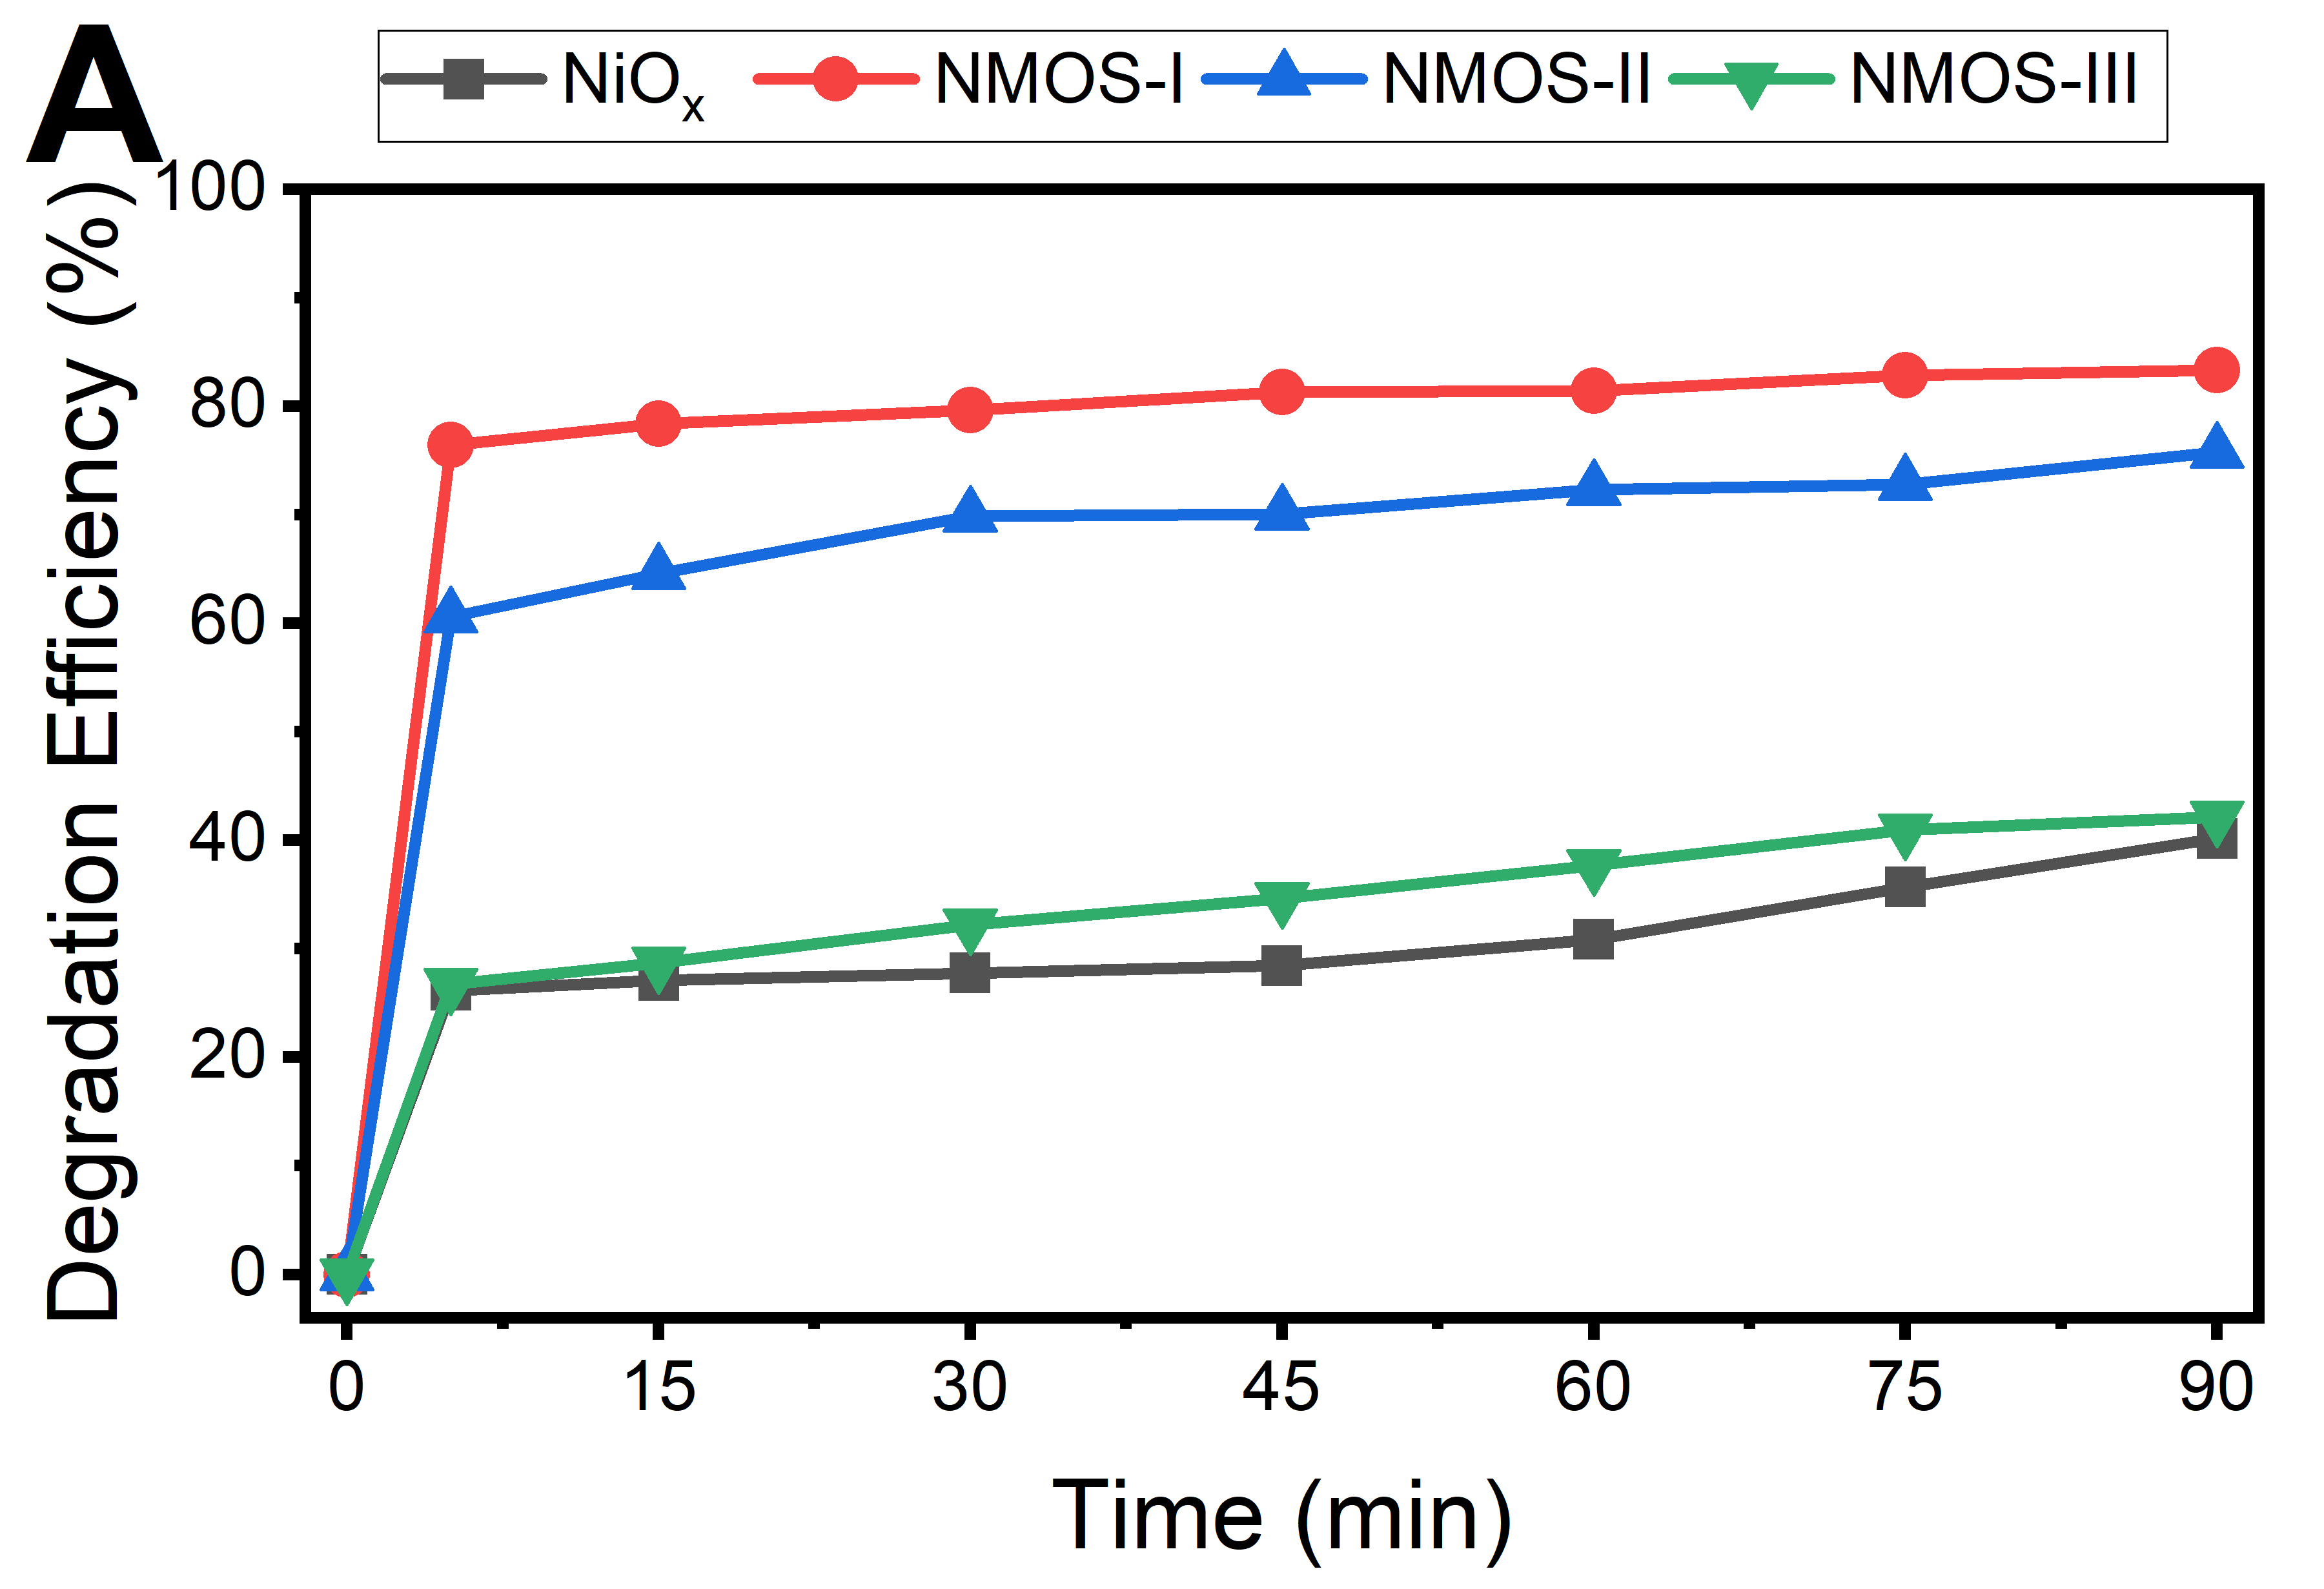

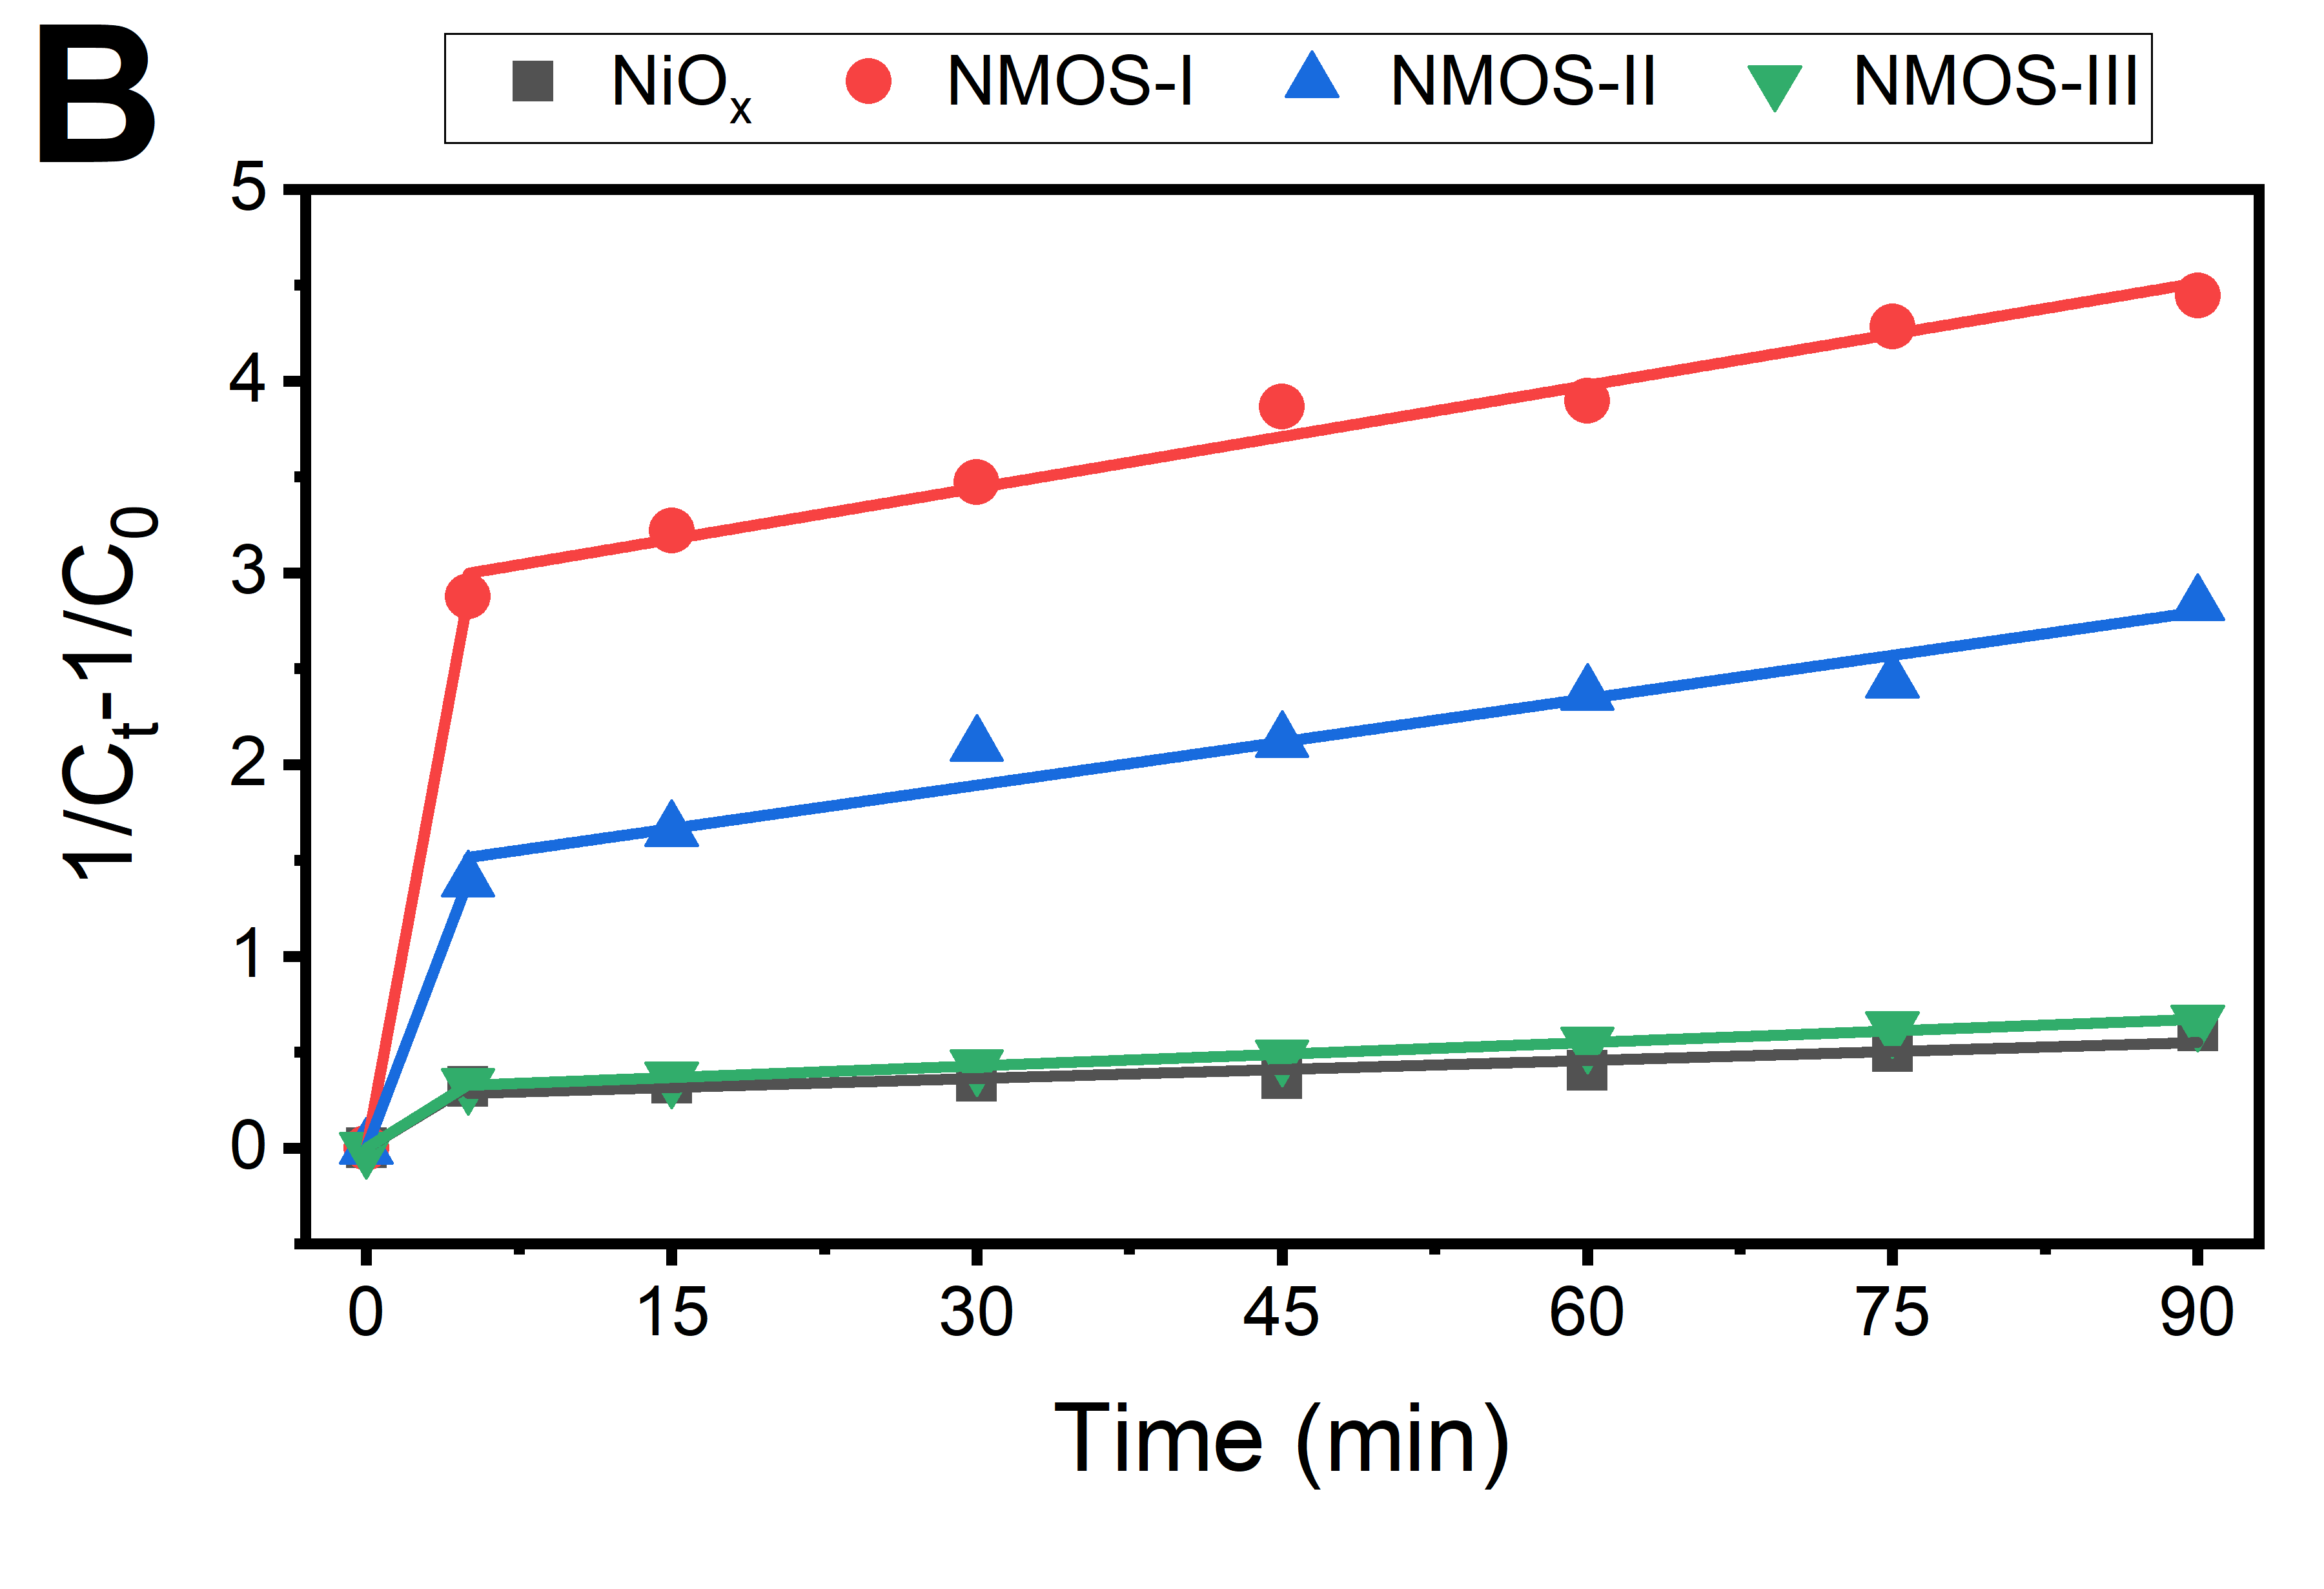
**Figure S6**: (A) Photodegradation efficiency of NiOₓ and NMOS-I-III NCs under light illumination and (B) Pseudo-second order kinetics of MB degradation using NiOₓ and NMOS-I-III NCs

**Table S5**: Kinetic parameters based on the second-order model

| Sample | K₂ (min⁻¹),R² | K₂ (min⁻¹),R² |
| --- | --- | --- |
| NiOₓ NPs | 0.064, 1 | 0.003, 0.84 |
| NMOS-I NCs | 0.575, 1 | 0.018, 0.97 |
| NMOS-II NCs | 0.279, 1 | 0.015, 0.94 |
| NMOS-III NCs | 0.066, 1 | 0.004, 0.99 |
